## 1 **Bacteria defend against phages through type IV pilus glycosylation**

2 Hanjeong Harvey<sup>1</sup>, Joseph Bondy-Denomy<sup>2</sup>, H el ene Marquis<sup>3</sup>, Kristina M. Sztanko<sup>3</sup>,  
3 Alan R. Davidson<sup>2,3\*</sup>, and Lori L. Burrows<sup>1\*</sup>.

4 <sup>1</sup>Dept. of Biochemistry and Biomedical Sciences and the Michael G. DeGroote Institute  
5 for Infectious Diseases Research, McMaster University; <sup>2</sup>Dept. of Biochemistry and  
6 <sup>3</sup>Department of Molecular Genetics, University of Toronto; and <sup>3</sup>Cornell University  
7 College of Veterinary Medicine.

8

9 **Running title:** Pilus glycosylation blocks bacteriophage infection

10

11 \*For correspondence:

12 Lori L. Burrows: [burrowl@mcmaster.ca](mailto:burrowl@mcmaster.ca)

13 Alan R. Davidson: [alan.davidson@utoronto.ca](mailto:alan.davidson@utoronto.ca)

14

### 15 **ABSTRACT**

16 Bacterial surface structures such as type IV pili are common receptors for phage.  
17 Strains of the opportunistic pathogen *Pseudomonas aeruginosa* express one of five  
18 different major type IV pilin alleles, two of which are glycosylated with either  
19 lipopolysaccharide O-antigen units or polymers of D-arabinofuranose. Here we show  
20 that both these post-translational modifications protect *P. aeruginosa* from a variety of  
21 pilus-specific phages. We identified a phage capable of infecting strains expressing both  
22 non-glycosylated and glycosylated pilins, and through construction of a chimeric phage,  
23 traced this ability to its unique tail proteins. Alteration of pilin sequence, or masking of  
24 binding sites by glycosylation, both block phage infection. The energy invested by  
25 prokaryotes in glycosylating thousands of pilin subunits is thus explained by the  
26 protection against phage predation provided by these common decorations.

27

### 28 **SIGNIFICANCE**

29 Post-translational modification of bacterial and archaeal surface structures such as pili  
30 and flagella is widespread, but the function of these decorations is not clear. We  
31 propose that predation by bacteriophages that use these structures as receptors selects  
32 for strains that mask potential phage binding sites using glycosylation. Phages are of  
33 significant interest as alternative treatments for antibiotic-resistant pathogens, but the  
34 ways in which phage interact with host receptors are not well understood. We show that  
35 specific phage tail proteins allow for infection of strains with glycosylated pili, providing a  
36 foundation for the creation of designer phages that can circumvent first-line bacterial  
37 defenses.

38

## 39 INTRODUCTION

40 Phages present a major challenge to bacterial survival in most environments <sup>1</sup>.  
41 For this reason, bacteria have evolved a battery of anti-phage defenses including  
42 CRISPR-Cas, restriction-modification, and abortive infection systems <sup>2, 3, 4</sup>. Such  
43 strategies are effective at inhibiting diverse types of phage, but the phage genome –  
44 which encodes many potentially dangerous gene products – is still allowed to enter the  
45 cell. The safest and most effective way to inhibit phage infection is to block it at its initial  
46 step, phage particle adsorption to the cell surface. Here we describe a cell-surface  
47 modification of *Pseudomonas aeruginosa* that can block infection by many different  
48 phages.

49 Although a large number of diverse phages infecting *P. aeruginosa* have been  
50 described, they use predominantly two cell surface receptors, lipopolysaccharides (LPS)  
51 and type IV pili (T4P) <sup>5, 6</sup>. It is likely that the evolution of different LPS O-antigen  
52 serotypes in *P. aeruginosa* strains has been shaped by the battle with phages, since  
53 individual phage types generally infect only limited subsets of these serotypes. However,  
54 it is unclear how targeting of T4P by phages has affected the evolution of their  
55 components.

56 T4P are used by a wide variety of bacterial and archaeal species for adherence,  
57 biofilm formation, DNA uptake, and a form of surface-associated motility called  
58 ‘twitching’ <sup>7, 8, 9</sup>. T4P are also virulence factors for many bacterial pathogens, including *P.*  
59 *aeruginosa* <sup>10, 11, 12, 13, 14</sup>. Although many *P. aeruginosa* phages use T4P as receptors <sup>6,</sup>  
60 <sup>15, 16, 17</sup>, the exact manner in which they interact with pili remains unknown. T4P are  
61 composed of thousands of copies of the major pilin, PilA, but also contain small  
62 amounts of minor (low-abundance) pilins that are thought to prime assembly by forming  
63 an initiation complex to which major pilins are subsequently added, extending the pilus  
64 from its base in the inner membrane <sup>18</sup>. Thus, minor pilins are most likely positioned at  
65 the tip of assembled pili <sup>19</sup>, though rare incorporation along the filament may also occur  
66 <sup>20</sup>. Detailed electron microscopy studies of *P. aeruginosa* pilus-specific phages  
67 suggested that they bind along the length of the pilus, and are pulled closer to the cell  
68 surface when the pilus retracts <sup>21</sup>. These observations imply that the phages bind to the  
69 major pilin directly, though this assumption has not been formally tested.

70 Each *P. aeruginosa* strain encodes one of 5 different major pilin alleles at a  
71 conserved locus located between the *pilB* gene, encoding the pilus extension ATPase,  
72 and a tRNA<sup>Thr</sup> gene <sup>22</sup>. The pilin variants differ with respect to their length (150 to 173  
73 residues), the number of amino acids (12 to 29 residues) between the two C-terminal  
74 Cys residues that form a structurally and functionally critical disulfide-bonded loop or ‘D-  
75 region’, and the presence of specific pilin accessory genes immediately downstream of  
76 the *pilA* gene. A census of nearly 300 strains <sup>22</sup> revealed that the most common allele is  
77 group I, a pilin that is glycosylated at the C-terminal Ser by its associated  
78 glycosyltransferase, TfpO <sup>23</sup>. The pilin glycan is an O-antigen unit, sourced from the O-  
79 specific antigen (OSA, formerly B-band) lipopolysaccharide (LPS) biosynthetic pathway  
80 <sup>24</sup>. The group I allele was over-represented (close to 70%) in strains isolated from cystic  
81 fibrosis patients, suggesting that it provides a significant advantage in certain  
82 environments <sup>22</sup>. We subsequently described a second, distinct glycosylation system in  
83 group IV strains, such as PA7 <sup>25, 26, 27</sup>. The pilin subunits in this group are glycosylated

84 by their cognate glycosyltransferase TfpW on multiple Ser and Thr residues with  
85 homopolymers of  $\alpha$ 1,5-linked D-arabinofuranose (D-Araf). The genes encoding the  
86 biosynthesis of D-Araf polymers are unlinked to the pilin locus, but glycosylation is  
87 important for stable pilin expression <sup>26</sup>.

88 A convincing reason for the prevalence of pilin glycosylation in nature has not yet  
89 been put forward, though this modification has a modest effect on pathogenicity in mice  
90 <sup>28</sup> and decreases twitching motility on plastic <sup>29, 30</sup>. In *Neisseria meningitidis*, an obligate  
91 human commensal, and in the multidrug resistant genus *Acinetobacter*, pilin  
92 glycosylation was proposed to block binding of pilin-specific antibodies <sup>31, 32</sup>. Here we  
93 show that modification of *P. aeruginosa* pilins by either of its glycosylation systems  
94 blocks infection by many pilus-specific phages. We further show that phages producing  
95 unique tail proteins can partially breach this defense. The ability of pilin glycosylation to  
96 protect against phage predation provides a compelling rationale for the widespread  
97 occurrence of this prokaryotic post-translational modification.

98

## 99 RESULTS

### 100 Pilin glycosylation blocks phage infection

101 A previous study of *P. aeruginosa* strain 1244, which expresses glycosylated  
102 group I pilins, concluded that this post-translational modification had no effect on phage  
103 susceptibility <sup>28</sup>. However, that study used a phage that was capable of infecting the wild  
104 type strain, which expresses glycosylated pilins. While investigating the host range of a  
105 large number of pilus-specific phages that we isolated previously <sup>17</sup>, we noted that some  
106 were capable of infecting a 1244 *tfpO* mutant, which produces unmodified pilins, but not  
107 its wild type parent. These results hinted that pilin glycosylation might represent a  
108 mechanism of resistance to phages that use the pilus as a receptor.

109 Since most of the phages in our collection grow poorly on the 1244 wild type or  
110 *tfpO* mutant strains, we performed further studies using the common laboratory strain  
111 PAO1, which is sensitive to many more phages. To compare the ability of different *pilA*  
112 alleles in a common genetic background to allow phage infection, we used a set of  
113 recombinant strains expressing the *pilA* genes of interest from an arabinose-inducible  
114 plasmid in a PAO1 *pilA* null mutant <sup>29</sup>. We then used standard phage spotting assays <sup>17</sup>  
115 to assess the ability of 19 different T4P-dependent non-contractile tailed phages to  
116 replicate on strains expressing the native PAO1 PilA<sub>II</sub> (group II), or the strain 1244 PilA<sub>I</sub>  
117 (group I) in the presence or absence of TfpO, which mediates pilin glycosylation. We  
118 found that while all these phages plated robustly on the strains expressing PilA<sub>II</sub> or  
119 unglycosylated PilA<sub>I</sub>, TfpO-mediated glycosylation of PilA<sub>I</sub> with O-antigen units  
120 completely inhibited the growth of all except phage DMS3, which was partially inhibited  
121 (Table 1).

**Table 1. Titer of phages on recombinant PAO1 strains**

| Phages | PAO1 <i>pilA</i>  |                                         |                                                       |                                          |
|--------|-------------------|-----------------------------------------|-------------------------------------------------------|------------------------------------------|
|        | PAO1 <sup>a</sup> | + <i>pilA</i> <sub>I</sub> <sup>b</sup> | + <i>pilA</i> <sub>I</sub> - <i>tfpO</i> <sup>c</sup> | + <i>pilA</i> <sub>II</sub> <sup>d</sup> |
| DMS3   | -5                | -4                                      | -3                                                    | -4                                       |
| JBD26  | -6                | -5                                      | 0                                                     | -5                                       |
| JBD68  | -6                | -5                                      | 0                                                     | -6                                       |
| JBD8   | -6                | -6                                      | 0                                                     | -6                                       |
| JBD23  | -6                | -4                                      | 0                                                     | -4                                       |
| JBD24  | -6                | -6                                      | 0                                                     | -6                                       |
| JBD35c | -6                | -5                                      | 0                                                     | -5                                       |
| JBD69a | -6                | -6                                      | 0                                                     | -6                                       |
| MP22   | -5                | -4                                      | 0                                                     | -4                                       |
| MP29   | -5                | -4                                      | 0                                                     | -4                                       |
| JBD88a | -6                | -6                                      | 0                                                     | -6                                       |
| JBD16c | -6                | -4                                      | 0                                                     | -4                                       |
| JBD18  | -6                | -6                                      | 0                                                     | -6                                       |
| JBD25  | -6                | -6                                      | 0                                                     | -6                                       |
| JBD63  | -6                | -5                                      | 0                                                     | -5                                       |
| JBD67b | -6                | -6                                      | 0                                                     | -6                                       |
| D3112  | -6                | -5                                      | 0                                                     | -6                                       |
| JBD5   | -6                | -5                                      | 0                                                     | -5                                       |
| JBD10  | -6                | -4                                      | 0                                                     | -4                                       |
| JBD30  | -6                | -6                                      | 0                                                     | -6                                       |
| JBD93a | -5                | -4                                      | 0                                                     | -5                                       |
| M6     | -6                | 0                                       | 0                                                     | -6                                       |

<sup>a</sup>PAO1 wild type containing the vector pBADGr

<sup>b</sup>PAO1 *pilA* mutant expressing *pilA*<sub>I</sub> from *P. aeruginosa* 1244

<sup>c</sup>PAO1 *pilA* mutant expressing *pilA*<sub>I</sub> and *tfpO* from *P. aeruginosa*

<sup>d</sup>PAO1 *pilA* mutant expressing *pilA*<sub>II</sub> from *P. aeruginosa* PAO1

122

123

124

125

126

127

128

129

130

131

132

133

134

Most of the phages tested were similar in sequence and genome structure<sup>17</sup>, particularly within the phage tail operon expected to be involved in host receptor binding. For this reason, we focused further studies on three phages, JBD26, DMS3, and JBD68. JBD26 and DMS3 are very similar in sequence and represent the dominant group in this collection (*P. aeruginosa* phage MP22-like) while JBD68 resembles *P. aeruginosa* phage F10 (**Supplementary Table S1**) and its putative tail proteins display little similarity to those of the other phages<sup>17</sup>. All three of these phages plated robustly on a PAO1 *pilA* mutant expressing PilA<sub>I</sub> or PilA<sub>II</sub> (**Fig. 1A**). However, co-expression of PilA<sub>I</sub> and TfpO caused a greater than 10<sup>5</sup>-fold reduction of JBD26 and JBD68 infectivity, while infectivity of DMS3 was reduced by ~10<sup>3</sup>-fold (**Fig. 1A**). To further investigate this phenomenon, we mutated the C-terminal Ser of PilA<sub>I</sub> to Ala in the PilA<sub>I</sub> TfpO expressing strain, precluding attachment of the glycan to the pilin<sup>23</sup>. The resulting strain produced

135 non-glycosylated pilins and was susceptible to all three phages (**Fig. 1A**), confirming  
 136 that pilin modification was responsible for resistance.

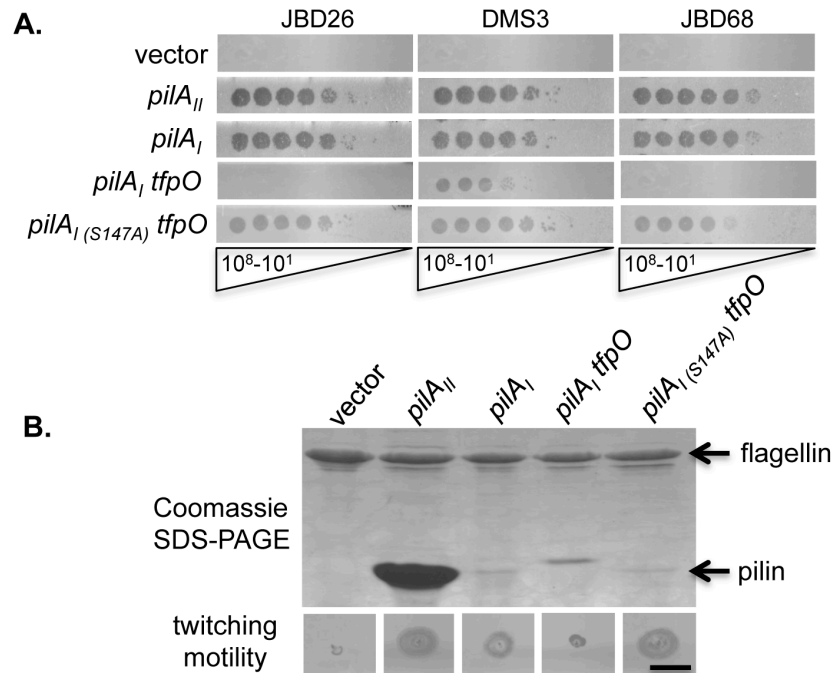

137  
 138 **Figure 1. Infection of a *P. aeruginosa* PAO1 *pilA* mutant expressing non-glycosylated versus**  
 139 **glycosylated pilins. A.** Five  $\mu$ l each of serial ten-fold dilutions ( $10^8$  to  $10^1$ ) of phages JBD26,  
 140 and JBD68 were spotted onto a PAO1 *pilA* mutant expressing the genes indicated on the left, expressed  
 141 from the pBADGr vector. The top row is the empty vector control. Loss of pilin glycosylation in the S147A  
 142 mutant restores phage susceptibility. **B.** Surface piliation of the PAO1 *pilA* mutant complemented with its  
 143 cognate pilin (*pilA<sub>II</sub>*), or that of group I strain 1244 (*pilA<sub>I</sub>*). Differences in the levels of recoverable surface  
 144 pili do not correlate with phage susceptibility or twitching motility on polystyrene. Scale bar = 1 cm.

145  
 146 To ensure that changes to phage susceptibility were due to changes in pilin  
 147 glycosylation status, and not to differences in levels of pili on the cell surface, we  
 148 examined the amount of surface pili sheared from the recombinant strains. As we  
 149 showed previously<sup>29</sup>, a PAO1 *pilA* mutant expressing group I pilins, regardless of their  
 150 glycosylation status, assembled fewer surface pili compared to the strain expressing the  
 151 native PilA<sub>II</sub> and had reduced twitching motility (**Fig. 1B**). This difference in surface  
 152 piliation did not affect phage susceptibility (compare *pilA<sub>II</sub>* versus *pilA<sub>I</sub>* in **Fig 1A**). Since  
 153 the PilA<sub>I</sub> TfpO strain expressed more surface pili than the PilA<sub>I</sub> strain expressing  
 154 unmodified pilins, the reduction in plaquing efficiency on the former was not due to  
 155 inadequate piliation (**Fig. 1B**).

### 157 **A putative DMS3 tail protein confers the ability to utilize glycosylated pili**

158 Phage DMS3 was distinct from the other phages tested, in that it could replicate  
 159 to some extent on cells expressing glycosylated pili. To understand what features of  
 160 DMS3 might explain this ability, we compared its genome to that of JBD26, a closely  
 161 related phage. Both are temperate double-stranded DNA phages with non-contractile



162 tails. The two phages have similar genome sizes (~37 kb) and share 81% identity at the  
163 nucleotide level (Genbank accession JN811560 for JBD26, and NC\_008717 for DMS3;  
164 <sup>33</sup>). However, one striking difference between these phages occurs directly downstream  
165 of genes encoding their tail components. In this region, the genome of JBD26 contains  
166 two open reading frames (ORFs) – 59 and 60 – positioned between conserved ORFs  
167 58 and 61, while DMS3 has 3 ORFs – 49-51 – at the same position (**Fig. 2A**).  
168 Comparison of the amino acid sequences of the predicted gene products (gp) revealed  
169 that JBD26 gp59 and DMS3 gp49 are 86% identical over the first 153 residues (shown  
170 in white in **Fig 2A**), but then their sequences diverge completely (**Supplementary Fig.**  
171 **S1A**). Similarly, the last 47 residues of JBD26 gp60 and DMS3 gp51 are 96% identical,  
172 while the N-termini of those proteins differ. DMS3 gp50 has no counterpart in JBD26.  
173 Given the positioning of the genes encoding these proteins at the 3'-end of the tail  
174 encoding regions within their respective genomes, we hypothesized that they may  
175 encode tail proteins involved in host range specificity.

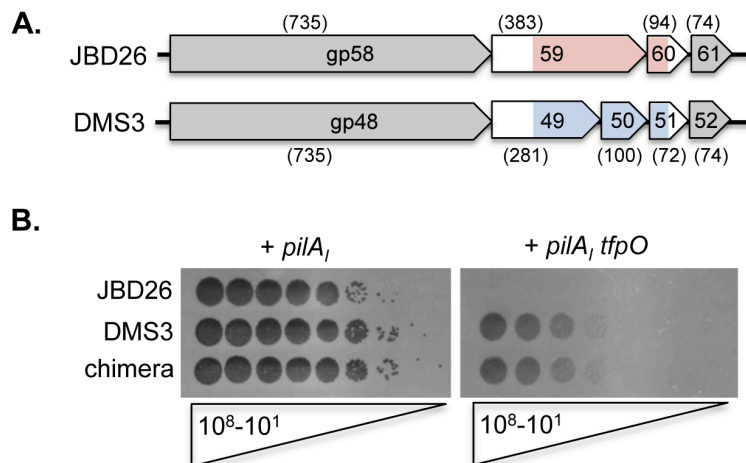

176

177 **Figure 2. A chimeric phage expressing DMS3 genes in the JBD26 background gains the ability to**  
178 **infect a strain with glycosylated pilins. A.** Map of JBD26 and DMS3 tail fibre genes and surrounding  
179 genomic conservation. The genomic organization of related genes from JBD26 and DMS3, and the  
180 predicted sizes of their products (amino acids, in brackets) are shown. Regions where sequences from  
181 the two phages diverge are colored pink and blue. The gp designations are omitted for most genes due to  
182 space limitations. The length of the predicted protein products in amino acids are shown in brackets  
183 above each open reading frame. Map not to scale. **B.** Plaque assay using 5  $\mu$ l each of serial 10-fold  
184 dilutions of phage ( $10^8$  –  $10^1$ ). A chimeric JBD26 phage expressing the DMS3 gp49-52 instead of its  
185 own gp59-60 gains the ability to infect a PAO1 *pilA* mutant complemented with the pilin from group I  
186 strain 1244 (*pilA<sub>i</sub>*), alone and with *tfpO*, encoding the cognate glycosyltransferase.

187

188 To determine if the differences in these putative tail proteins were responsible for  
189 unique ability of DMS3 to infect strains with glycosylated pilins, we generated a JBD26  
190 lysogen of strain PAO1, then swapped some of its tail protein genes for those of DMS3  
191 via homologous recombination. Open reading frames 59 and 60 of JBD26 were  
192 replaced with 49, 50 and 51 of DMS3, using the conserved flanking genes 58/48 and  
193 61/52 as regions of homology for recombination (**Fig. 2A**). Strikingly, the resulting  
194 JBD26/DMS3 chimeric phage infected strains expressed both non-glycosylated and  
195 glycosylated pilins to the same extent as DSM3 (**Fig. 2B**). These results imply that the

196 region of DMS3 encompassing ORFS 49-51 encodes the unique ability of DMS3 to use  
197 the glycosylated pilus for infection.

198

### 199 Pilin sequence modulates phage susceptibility

200 The C-terminal Ser that is glycosylated in group I pilins is adjacent to the D-  
201 region of PilA<sup>23</sup>, suggesting that post-translational modification could mask this  
202 potential phage binding surface (**Fig. 3A**). To test whether phages recognize the D-  
203 region of PilA, we exploited a set of previously engineered PilA<sub>II</sub> single-residue  
204 substitution mutants<sup>34</sup>. All mutants tested had similar levels of surface piliation (**Fig. 3B**),  
205 but plaquing assays revealed that a PilA<sub>II</sub> P138R mutant was approximately 1000-fold  
206 more resistant to JBD26 and JBD68 infection than wild type, while the effect of this  
207 mutation on susceptibility to DMS3 and the chimeric phage was minimal (**Fig. 3C**). A  
208 P138A substitution had no effect on susceptibility, while a P138M mutant had slightly  
209 reduced susceptibility, implying a specific interaction between phages JBD26 and  
210 JBD68 and the D-region of PilA<sub>II</sub> that is disrupted by changes in side chain electrostatics.  
211 These results indicate that DMS3 and the JBD26 chimera containing DMS3 sequences  
212 interact with PilA in a different manner than JBD26 and JBD68, potentially explaining  
213 the ability of DMS3 to infect strains that express glycosylated subunits.

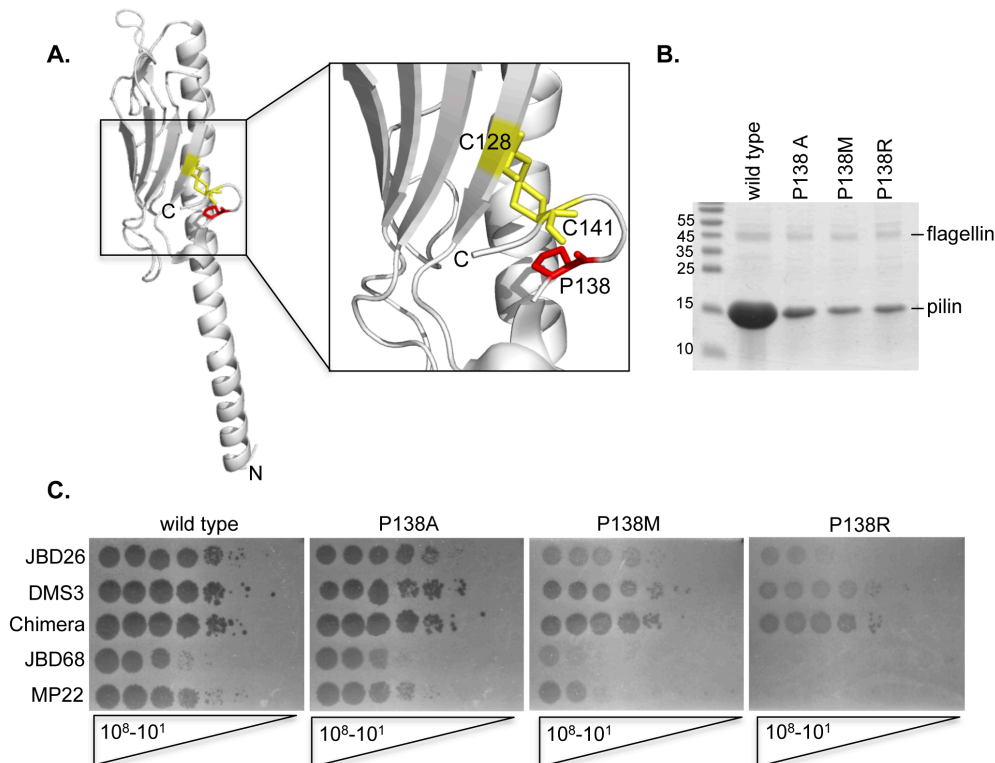

214

215 **Figure 3. Pilin D-region sequence affects phage susceptibility.** **A.** Model of a group II pilin showing  
216 the disulfide bonded Cys residues (yellow) demarking the C-terminal D region and the Pro138 residue  
217 (red) targeted for site directed mutagenesis. **B.** Relative surface piliation of the PilA<sub>II</sub> point mutants. All  
218 three mutants have similar levels of piliation<sup>34</sup>. **C.** Plaque assays using 5  $\mu$ l each of serial 10-fold dilutions  
219 of the phage indicated on the left (10e8 – 10e1). Expression of the P138R pilin in the PAO1 *pilA*

220 background reduces or blocks infection by JBD26, JBD68, and MP22, but not DMS3 or the JBD26  
221 chimera expressing DMS3 tail proteins, implying that DSM3 binds elsewhere.

222

## 223 Pilin glycosylation with D-arabinofuranose also blocks phage infection

224 *P. aeruginosa* strains expressing group IV pilins – such as PA7 and Pa5196 –  
225 encode a distinct pilin glycosylation system that adds homooligomers of D-Araf to  
226 multiple Ser and Thr residues on PilA<sub>IV</sub><sup>25</sup>. To investigate whether this form of  
227 glycosylation also serves as a phage defense mechanism, we tested a set of PAO1 *pilA*  
228 mutant strains expressing unmodified or glycosylated PilA<sub>IV</sub>. Because JBD26 does not  
229 infect strains expressing PilA<sub>IV</sub> well, we turned to a closely related phage, MP22<sup>35</sup>.  
230 MP22 gp54 has 99% identity to JBD26 gp59 that putatively recognizes unglycosylated  
231 pilins, and it has a similar infection pattern (**Fig. 3C**). We tested susceptibility of strains  
232 expressing D-Araf glycans to MP22, JBD68, DMS3, and the chimeric phage (**Fig. 4**).

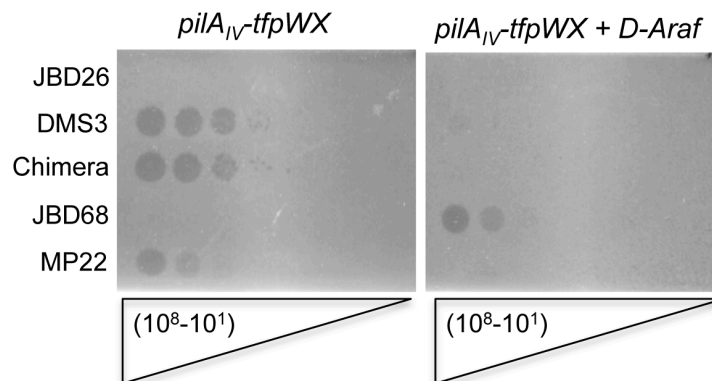

233

234 **Figure 4. Pilin D-arabinofuranosylation blocks phage infection.** Plaque assays using 5  $\mu$ l each of  
235 serial 10-fold dilutions of the phage indicated on the left ( $10^8$  –  $10^1$ ). Expression of PilA<sub>IV</sub> and its  
236 accessory proteins TfpWX in the PAO1 *pilA* background results in expression of unmodified pilins (left).  
237 Addition of the genes encoding the synthesis of D-arabinofuranose polymers (*D-Araf*) from pUCP20-  
238 6245-51 results in expression of glycosylated pilins<sup>26</sup>, and blocks infection by DMS3, the chimeric JBD26  
239 phage, and MP22.

240

241 Unlike glycosylation of pilins with O-antigen units, this form of glycosylation prevented  
242 infection by DSM3 and the chimera, as well as MP22. Interestingly, JBD68 could not  
243 infect the strain that produced unmodified PilA<sub>IV</sub>, but could infect the strain expressing  
244 glycosylated PilA<sub>IV</sub>, suggesting that it recognizes a new epitope present on the modified  
245 pilin, or the unique pilin glycans themselves. These data show that both of *P.*  
246 *aeruginosa*'s pilin glycosylation systems have the capacity to protect against subsets of  
247 pilus-specific phages. In addition, phages like JBD68 appear to have evolved to exploit  
248 some forms of pilin glycosylation for cell surface binding.

249

## 250 DISCUSSION

251 Since glycosylation of thousands of surface-exposed pilin subunits can be  
252 energetically costly (each sugar requires the production of a nucleotide-activated  
253 precursor, and each glycan unit contains multiple sugars), the addition of such



254 modifications must provide a valuable benefit. Here, we showed that pilin glycosylation  
255 provides protection against many pilus-specific bacteriophages. Given the powerful  
256 impact of phage predation on bacterial evolution, our data provide a compelling  
257 rationale for the widespread glycosylation of pilins in environmental and pathogenic  
258 bacteria. Glycosylation of *P. aeruginosa* pilins was previously suggested to protect  
259 against complement binding, opsonization by pulmonary surfactant protein A, or against  
260 proteolytic degradation by host or self-produced proteases<sup>36, 37</sup>. Similar hypotheses  
261 have been advanced to explain the function of pilin glycosylation in *Neisseria* and  
262 *Acinetobacter*<sup>31, 32</sup>. While these effects of pilus glycosylation may have some impact  
263 within the context of infection, resistance to phage predation is likely of greater  
264 advantage to bacteria in a much broader range of native environments and conditions.

265 A recent study of *P. aeruginosa* phages from cystic fibrosis sputum samples  
266 suggested that phage density was ~10-100 fold greater than that of *P. aeruginosa*, and  
267 that lytic phage activity controls bacterial numbers in chronically infected patients<sup>38</sup>.  
268 Pilin glycosylation thus has the potential to influence virulence both directly – blocking  
269 antibody and complement binding – and indirectly, allowing bacteria to make functional  
270 pili and maintain high bacterial loads in the presence of pilus-specific phages. These  
271 features may account for the reported prevalence (~70%) of group I strains of *P.*  
272 *aeruginosa* among CF isolates<sup>22</sup>, as such strains are likely to be more generally  
273 resistant to phage infection than strains producing non-glycosylated pili. The phage  
274 protection afforded by pilin glycosylation may also explain why group I and group IV  
275 pilins assemble poorly in the absence of this modification (**Fig. 1**)<sup>26</sup>. Limiting the  
276 assembly of unmodified pilins may be a quality-control mechanism that reduces the  
277 dangerous possibility that non-glycosylated – and thus phage-vulnerable – pili are  
278 expressed on the cell surface. Although loss of pilus expression or function can also  
279 protect the bacteria from phage predation, these are disadvantageous phenotypes that  
280 reduce fitness<sup>39, 40, 41</sup>.

281 While T4P are well-established receptors for phage, the exact mode of phage  
282 binding has not been clarified. Electron micrographs show binding of phage along the  
283 length of pilus filaments<sup>42</sup>, presumably to the major pilin. Our data strongly support the  
284 conclusion that phages bind directly to PilA, rather than any of the minor pilins, for the  
285 following reasons: 1) Glycosylation of PilA blocks phage infection, and the minor pilins  
286 are not glycosylated<sup>18, 20, 43</sup>. 2) The plaquing ability of all the phages tested was affected  
287 by the group and/or glycosylation state of the major pilin, and all the assays were  
288 performed in the PAO1 background where the minor pilins were invariant. 3) Specific  
289 single amino acid substitutions in PilA changed the susceptibility of strains to phage  
290 infection (**Fig. 3**). Although we cannot rule out that some pilus-specific phages may bind  
291 to minor pilins, the phages studied here interact with the major pilin. Given that minor  
292 pilins are mainly localized to the pilus tip and are present in minute quantities relative to  
293 the major pilin, the binding of phages to PilA is expected to be a superior strategy for  
294 cell surface engagement.

295 The ability of the phages used in this study to use both unmodified PilA<sub>I</sub> and PilA<sub>II</sub>  
296 as receptors is remarkable, as these proteins are only 25% identical outside of the  
297 highly conserved N-terminal 25 residues that are largely buried in the interior of  
298 assembled pilus filaments<sup>44, 45</sup>. The binding of phages to diverse PilA proteins likely

299 reflects the results of the evolutionary drive for phage to use a wide variety of pili as  
300 receptors, and further emphasizes the difficulty of evading phage predation only through  
301 accumulation of amino acid substitutions in PilA, which could also have negative  
302 functional consequences. Pilus glycosylation may provide a more effective defense  
303 against phages, by masking phage-binding sites through steric hindrance. Interestingly,  
304 some pilus-specific phages such as JBD68 appear to have evolved the capacity to  
305 recognize pilins with specific post-translational modifications (**Fig. 4**), potentially  
306 broadening their host range.

307 A role for DMS3 gp49, gp50 and/or gp51 in recognizing the glycosylated pilus  
308 was demonstrated by recombining the genes encoding these proteins into JBD26,  
309 allowing this phage to use the glycosylated group I pilus for infection. DMS3 gp49 and  
310 JBD26 gp59 each have a conserved 100 residue N-terminal domain that corresponds to  
311 the Pfam protein family DUF2793 (PF10983). Proteins containing this domain are  
312 encoded in a variety of non-contractile tailed phage and prophage genomes, with the  
313 DUF2793 protein invariably encoded immediately downstream of the gene encoding the  
314 central fibre protein<sup>46</sup> as in JBD26 and DMS3 (**Fig. 2A**). Central fibre proteins and  
315 others encoded in the 3'-regions of tail operons are often involved in host cell receptor  
316 binding<sup>46, 47</sup>. DUF2793 proteins are variable in length and display highly divergent C-  
317 terminal regions. The conserved N-termini likely attach these proteins to the phage  
318 particle while the C-termini may interact with the variable surfaces of host cells. Among  
319 the functions predicted for the variable C-terminal domains are peptidase and glycanase  
320 activities (**Supplementary Fig. S1B**). This modular organization may prove useful for  
321 future development of designer phages that can target specific species or strains. Mass  
322 spectrometry on purified phages closely related to JBD26 and DMS3 (**Supplementary**  
323 **Table S1**) confirmed that the DUF2793 proteins are present in phage particles. We  
324 conclude that gp49 and gp59 are the components of DMS3 and JBD26 tails,  
325 respectively, that are responsible for binding to PilA. The difference in the effects of PilA  
326 mutations on infectivity of JBD26 versus DMS3 (**Fig. 3C**) implies that DMS3 gp49 and  
327 JBD26 gp59 interact with different regions of PilA, accounting for DMS3's ability to bind  
328 glycosylated PilA<sub>I</sub>, while JBD26 gp59 cannot. In contrast, the inability of DMS3 gp49 to  
329 bind glycosylated PilA<sub>IV</sub> is likely due to the different position of these modifications on  
330 the protein<sup>25</sup>. The identical plating behavior of the JBD26/DMS3 chimeric phage and  
331 DMS3 implies that gp49 is responsible for conferring the unique host specificity of  
332 DMS3. The functions of DMS3 gp50 and gp51 are not known, and homologues of gp51  
333 were not found in phage particles (**Supplementary Table S2**).

334 The function of type IV pilin glycosylation has long remained a mystery. We show  
335 here that both of *P. aeruginosa*'s glycosylation systems block infection by a variety of  
336 pilus-specific phages, and suggest that resistance to phage attack is the major  
337 evolutionary driving force for these post-translational modifications. Since pili are  
338 common targets for phage adsorption in many species, pilus glycosylation may be a  
339 widespread anti-phage defense system. The large size of oligosaccharide groups and  
340 their typically negative charge can serve to effectively block phage accessibility to large  
341 portions of the pilus surface<sup>31</sup>, and thus engender resistance to diverse phages. In this  
342 way, glycosylation is a more broadly useful resistance mechanism than amino acid  
343 substitutions in PilA, a conclusion that is supported by the ability of the phages tested  
344 here to utilize PilA proteins of diverse sequence as receptors. Glycosylation also

345 provides a means to block phage infection without compromising the important adaptive  
346 functions of the type IV pilus. In conclusion, pilus glycosylation is another fascinating  
347 manifestation of the evolutionary battle between bacteria and phages. The ability of  
348 phages DMS3 and JBD68 to each partially overcome specific forms of pilus  
349 glycosylation is likely a foreshadowing of a variety of mechanisms by which phages can  
350 circumvent this defense that await discovery.

351

## 352 **METHODS**

### 353 **Bacterial strains, phage, and plasmids used in this work**

354 Bacterial strains, phage, and plasmids are listed in **Supplementary Table S3**.  
355 Unless noted otherwise, *E. coli* and *P. aeruginosa* were grown at 37°C in Luria-Bertani  
356 (LB) broth or 1.5% agar plates supplemented with antibiotics at the following final  
357 concentrations when necessary (µg/mL): ampicillin (Ap), 100; kanamycin (Kn), 50;  
358 gentamicin (Gm), 15 for *E. coli* and 30 for *P. aeruginosa*. Plasmids were transformed by  
359 heat shock into chemically competent *E. coli* cells or by electroporation or biparental  
360 mating with *E. coli* SM10 into *P. aeruginosa* as previously described<sup>26</sup>. All constructs  
361 were verified by DNA sequencing.

### 362 **Phage plaquing assays**

363 Phage plaque assays were performed as described previously<sup>48</sup>, with  
364 modifications. Briefly, bacteria were grown overnight at 37°C with shaking, and then  
365 subcultured 1:100 in LB plus 8 mM MgSO<sub>4</sub> and grown for 3 h at 37°C with shaking. The  
366 subculture was then standardized to OD<sub>600</sub> of 0.3 in LB plus 8 mM MgSO<sub>4</sub> and 100 µl  
367 was mixed with 8 ml top agar (LB plus 8 mM MgSO<sub>4</sub>, 0.6% agar), which was overlaid  
368 on a pre-poured rectangular LB plus 8 mM MgSO<sub>4</sub> 1.5% agar plate containing  
369 antibiotics and L-arabinose where indicated. After allowing the top agar to solidify, it was  
370 air-dried with the lid off in a biosafety cabinet for 15 min. Phage stocks were  
371 standardized to a PFU/ml of 10<sup>8</sup> and 10-fold serially diluted in LB plus 8 mM MgSO<sub>4</sub>,  
372 and 5 µl of each dilution was spotted onto the prepared plates. After allowing the spots  
373 to air dry for 10 min with lid on, the plates were incubated inverted for 18 h at 37°C. The  
374 plates were then photographed and the titre estimated as the lowest dilution generating  
375 a complete zone of cell lysis.

### 376 **Twitching motility assays**

377 Twitching assays were performed as described previously<sup>29</sup>. Single colonies  
378 were stab inoculated to the bottom of a 1% LB agar plate which was incubated for 36 h  
379 at 37°C. The agar was then carefully discarded, and the adherent bacteria stained with  
380 1% (w/v) crystal violet dye, followed by washing with tap water to remove unbound dye.  
381 Twitching zone areas were measured using ImageJ software (NIH). All experiments  
382 were performed in triplicate with at least three independent replicates.

### 383 **Sheared surface protein preparation**

384 The levels of surface-exposed pili and flagella were analyzed as described  
385 previously<sup>26</sup>. Briefly, the strains of interest were streaked in a grid-like pattern on LB  
386 agar plates and incubated at 37°C for ~16 h. The cells were scraped from the plates  
387 with glass coverslips and resuspended in 4.5 mL of phosphate buffered saline, pH 7.0.

388 Surface proteins were sheared by vortexing the cell suspensions for 30 s. The  
389 suspensions were transferred to three separate 1.5 mL Eppendorf tubes and cells  
390 pelleted by centrifugation at 11,688 x *g* for 5 min. The supernatant was transferred to  
391 fresh tubes and centrifuged at 11,688 x *g* for 20 min to pellet remaining cells. After  
392 transfer of supernatants to new tubes, the surface proteins were precipitated by adding  
393 1/10 volume of 5M NaCl and 30% (w/v) polyethylene glycol (PEG 8000, Sigma Aldrich)  
394 to each tube and incubating on ice for 90 min. Precipitated proteins were collected by  
395 centrifugation at 11,688 x *g*, and resuspended in 150  $\mu$ L of 1X SDS sample buffer  
396 (125mM Tris, pH 6.8, 2%  $\beta$ -mercaptoethanol, 20% glycerol, 4% SDS and 0.001%  
397 bromophenol blue). Samples were boiled for 10 min and separated on 15% SDS-PAGE  
398 gels. Proteins were visualized by staining with Coomassie brilliant blue.

### 399 **Generation of a JBD26-DMS3 chimeric phage**

400 To create a JBD26 chimeric phage expressing DMS3 tail protein, we first  
401 generated a JBD26 lysogen of strain PAO1. The primers chimera1 5'-  
402 ACAAGAGAATTCCAGGATCAGTTCAATCTG-3' and chimera2 5'-  
403 ACAAGACTGCAGCTAGCCATTGTGCTGTAGCG-3', containing EcoRI and PstI  
404 restriction sites (underlined), were used to amplify from the middle of DMS3 gp48 to the  
405 end of gp52 (~3 kb). The resulting PCR product was gel-purified and ligated into the  
406 suicide vector, pEX18Gm<sup>49</sup>. After validation of the construct by DNA sequencing, it was  
407 introduced into *E. coli* SM10 by CaCl<sub>2</sub> transformation and transferred to the PAO1  
408 JBD26 lysogen by biparental mating as described previously<sup>26</sup>. Following overnight  
409 incubation at 37°C, mating mixtures were resuspended in 1 ml LB and 100  $\mu$ l was  
410 plated onto *Pseudomonas* Isolation agar (PIA) containing 100  $\mu$ g/ml of Gm to  
411 counterselect the *E. coli* donor. Colonies were picked from PIA onto LB Gm30 agar and  
412 from there, onto LB no salt, 5% sucrose agar to select against merodiploids. Colonies  
413 that grew on sucrose plates were streaked in parallel on LB Gm30 and LB agar, and  
414 Gm sensitive colonies were tested by colony PCR using primers DMS3gp50p1 5'-  
415 GAACAGAATTCGAGGTGGTTCTGATGATGATCATC-3' DMS3gp50p2 5'-  
416 GAACAGGATCCTCATTGCGGCAACTCCACAGG-3', designed to amplify DMS3 gp50.  
417 DNA from PCR-positive colonies was reamplified using primers DMS3gp49p1 5'-  
418 GAACAGAATTCAGGAGGCGTATCCGCATGAGC-3' and DMS3gp52p2 5'-  
419 ACAAGACTGCAGCTAGCCATTGTGCTGTAGCG-3', and the resulting amplicons  
420 sequenced to verify gene replacement.

421 To induce the excision of the chimeric phage, the lysogen was grown overnight in  
422 LB and subcultured 1:100 to OD<sub>600</sub> 0.6 in 3 ml of the same medium, then treated with  
423 mitocycin C (final concentration 3  $\mu$ g/ml) for 18 h. The remaining cells were lysed by  
424 adding ~250  $\mu$ l chloroform and vortexing briefly to mix. The phage were titred by  
425 standard plaque assay. Ten-fold serial dilutions of the lysate were prepared and 100  $\mu$ l  
426 each mixed with 100  $\mu$ l of PAO1 standardized to OD<sub>600</sub> 0.3 in LB plus 10 mM MgSO<sub>4</sub>  
427 and added to 8 ml of top agar (LB plus MgSO<sub>4</sub>, 0.6% agar) that was overlaid onto a  
428 standard LB plus 10 mM MgSO<sub>4</sub> plate and allowed to solidify. After 18h incubation at  
429 37C, the dilution(s) giving countable plaques were used to calculate the plaque-forming  
430 units per ml of lysate.

431



## 432 **Mass spectrometry analysis of phage particles**

433 We subjected  $3.8 \times 10^9$  phage particles from lysate purified twice by CsCl density  
434 gradient ultracentrifugation to tryptic digest as described<sup>50</sup>. LC-MS/MS spectra were  
435 collected on a linear ion-trap instrument (ThermoFisher LTQ)(SPARC BioCentre, The  
436 Hospital for Sick Children, Toronto, Canada). Proteins were identified using Mascot  
437 (Matrix Science, London, UK) and analyzed in Scaffold version 3.0 (Proteome Software  
438 Inc., Portland, OR, USA). The protein identification cut off was set at a confidence level  
439 of 95% with a requirement for at least two peptides to match to a protein.

440

## 441 **ACKNOWLEDGEMENTS**

442 We thank Karen Maxwell for helpful comments on the manuscript. This work was  
443 supported by Canadian Institutes of Health Research (CIHR) Open Operating Grants to  
444 LLB (MOP 86639) and to ARD (XNE-86943 and MOP-115039).

445

## 446 **AUTHOR CONTRIBUTIONS**

447 HH, ARD, and LLB designed the study; HH, JBD, HM, and KMS performed  
448 experiments; HH, ARD, and LLB analyzed the data; ARD and LLB wrote the manuscript  
449 with input from JBD and HM. All authors approved the final version.

450

## 451 **REFERENCES**

- 452 1. Weinbauer, M.G. Ecology of prokaryotic viruses. *FEMS Microbiol Rev* **28**, 127-  
453 181 (2004).
- 454
- 455 2. Sampson, T.R. & Weiss, D.S. Alternative roles for CRISPR/Cas systems in  
456 bacterial pathogenesis. *PLoS Pathog* **9**, e1003621 (2013).
- 457
- 458 3. Sorek, R., Lawrence, C.M. & Wiedenheft, B. CRISPR-mediated adaptive immune  
459 systems in bacteria and archaea. *Annu Rev Biochem* **82**, 237-266 (2013).
- 460
- 461 4. Labrie, S.J., Samson, J.E. & Moineau, S. Bacteriophage resistance mechanisms.  
462 *Nat Rev Microbiol* **8**, 317-327 (2010).
- 463
- 464 5. Lam, J.S., Taylor, V.L., Islam, S.T., Hao, Y. & Kocincova, D. Genetic and  
465 Functional Diversity of *Pseudomonas aeruginosa* Lipopolysaccharide. *Front*  
466 *Microbiol* **2**, 118 (2011).
- 467
- 468 6. Bradley, D.E. & Pitt, T.L. Pilus-dependence of four *Pseudomonas aeruginosa*  
469 bacteriophages with non-contractile tails. *J Gen Virol* **24**, 1-15 (1974).

470



- 471 7. Burrows, L.L. *Pseudomonas aeruginosa* twitching motility: type IV pili in action.  
472 *Annu Rev Microbiol* **66**, 493-520 (2012).  
473
- 474 8. Craig, L. & Li, J. Type IV pili: paradoxes in form and function. *Curr Opin Struct*  
475 *Biol* **18**, 267-277 (2008).  
476
- 477 9. Mattick, J.S. Type IV pili and twitching motility. *Annu Rev Microbiol* **56**, 289-314  
478 (2002).  
479
- 480 10. Craig, L., Pique, M.E. & Tainer, J.A. Type IV pilus structure and bacterial  
481 pathogenicity. *Nat Rev Microbiol* **2**, 363-378 (2004).  
482
- 483 11. Heiniger, R.W., Winther-Larsen, H.C., Pickles, R.J., Koomey, M. & Wolfgang,  
484 M.C. Infection of human mucosal tissue by *Pseudomonas aeruginosa* requires  
485 sequential and mutually dependent virulence factors and a novel pilus-associated  
486 adhesin. *Cell Microbiol* **12**, 1158-1173 (2010).  
487
- 488 12. Ohama, M. *et al.* Intratracheal immunization with pili protein protects against  
489 mortality associated with *Pseudomonas aeruginosa* pneumonia in mice. *FEMS*  
490 *Immunol Med Microbiol* **47**, 107-115 (2006).  
491
- 492 13. Hahn, H.P. The type-4 pilus is the major virulence-associated adhesin of  
493 *Pseudomonas aeruginosa*--a review. *Gene* **192**, 99-108 (1997).  
494
- 495 14. Bucior, I., Pielage, J.F. & Engel, J.N. *Pseudomonas aeruginosa* pili and flagella  
496 mediate distinct binding and signaling events at the apical and basolateral  
497 surface of airway epithelium. *PLoS Pathog* **8**, e1002616 (2012).  
498
- 499 15. Bradley, D.E. Basic characterization of a *Pseudomonas aeruginosa* pilus-  
500 dependent bacteriophage with a long noncontractile tail. *J Virol* **12**, 1139-1148  
501 (1973).  
502
- 503 16. James, C.E. *et al.* Differential infection properties of three inducible prophages  
504 from an epidemic strain of *Pseudomonas aeruginosa*. *BMC Microbiol* **12**, 216  
505 (2012).  
506
- 507 17. Bondy-Denomy, J. *et al.* Prophages mediate defense against phage infection  
508 through diverse mechanisms. *ISME J* **10**, 2854-2866 (2016).  
509

- 510 18. Nguyen, Y. *et al.* *Pseudomonas aeruginosa* minor pilins prime type IVa pilus  
511 assembly and promote surface display of the PilY1 adhesin. *J Biol Chem* **290**,  
512 601-611 (2015).  
513
- 514 19. Winther-Larsen, H.C. *et al.* *Pseudomonas aeruginosa* Type IV pilus expression in  
515 *Neisseria gonorrhoeae*: effects of pilin subunit composition on function and  
516 organelle dynamics. *J Bacteriol* **189**, 6676-6685 (2007).  
517
- 518 20. Giltner, C.L., Habash, M. & Burrows, L.L. *Pseudomonas aeruginosa* minor pilins  
519 are incorporated into type IV pili. *J Mol Biol* **398**, 444-461 (2010).  
520
- 521 21. Bradley, D.E. Stimulation of pilus formation in *Pseudomonas aeruginosa* by RNA  
522 bacteriophage adsorption. *Biochem Biophys Res Commun* **47**, 1080-1087 (1972).  
523
- 524 22. Kus, J.V., Tullis, E., Cvitkovitch, D.G. & Burrows, L.L. Significant differences in  
525 type IV pilin allele distribution among *Pseudomonas aeruginosa* isolates from  
526 cystic fibrosis (CF) versus non-CF patients. *Microbiology* **150**, 1315-1326 (2004).  
527
- 528 23. Comer, J.E., Marshall, M.A., Blanch, V.J., Deal, C.D. & Castric, P. Identification  
529 of the *Pseudomonas aeruginosa* 1244 pilin glycosylation site. *Infect Immun* **70**,  
530 2837-2845 (2002).  
531
- 532 24. DiGiandomenico, A. *et al.* Glycosylation of *Pseudomonas aeruginosa* 1244 pilin:  
533 glycan substrate specificity. *Mol Microbiol* **46**, 519-530 (2002).  
534
- 535 25. Kus, J.V. *et al.* Modification of *Pseudomonas aeruginosa* Pa5196 type IV Pilins at  
536 multiple sites with D-Araf by a novel GT-C family Arabinosyltransferase, TfpW. *J*  
537 *Bacteriol* **190**, 7464-7478 (2008).  
538
- 539 26. Harvey, H., Kus, J.V., Tessier, L., Kelly, J. & Burrows, L.L. *Pseudomonas*  
540 *aeruginosa* D-arabinofuranose biosynthetic pathway and its role in type IV pilus  
541 assembly. *J Biol Chem* **286**, 28128-28137 (2011).  
542
- 543 27. Voisin, S. *et al.* Glycosylation of *Pseudomonas aeruginosa* strain Pa5196 type IV  
544 pilins with mycobacterium-like alpha-1,5-linked d-Araf oligosaccharides. *J*  
545 *Bacteriol* **189**, 151-159 (2007).  
546
- 547 28. Smedley, J.G., 3rd *et al.* Influence of pilin glycosylation on *Pseudomonas*  
548 *aeruginosa* 1244 pilus function. *Infect Immun* **73**, 7922-7931 (2005).

- 549
- 550 29. Asikyan, M.L., Kus, J.V. & Burrows, L.L. Novel proteins that modulate type IV  
551 pilus retraction dynamics in *Pseudomonas aeruginosa*. *J Bacteriol* **190**, 7022-  
552 7034 (2008).
- 553
- 554 30. Allison, T.M., Conrad, S. & Castric, P. The group I pilin glycan affects type IVa  
555 pilus hydrophobicity and twitching motility in *Pseudomonas aeruginosa* 1244.  
556 *Microbiology* **161**, 1780-1789 (2015).
- 557
- 558 31. Gault, J. *et al.* Neisseria meningitidis Type IV Pili Composed of Sequence  
559 Invariable Pilins Are Masked by Multisite Glycosylation. *PLoS Pathog* **11**,  
560 e1005162 (2015).
- 561
- 562 32. Piepenbrink, K.H. *et al.* Structural Diversity in the Type IV Pili of Multidrug-  
563 resistant *Acinetobacter*. *J Biol Chem* **291**, 22924-22935 (2016).
- 564
- 565 33. Zegans, M.E. *et al.* Interaction between bacteriophage DMS3 and host CRISPR  
566 region inhibits group behaviors of *Pseudomonas aeruginosa*. *J Bacteriol* **191**,  
567 210-219 (2009).
- 568
- 569 34. Harvey, H., Habash, M., Aidoo, F. & Burrows, L.L. Single-residue changes in the  
570 C-terminal disulfide-bonded loop of the *Pseudomonas aeruginosa* type IV pilin  
571 influence pilus assembly and twitching motility. *J Bacteriol* **191**, 6513-6524  
572 (2009).
- 573
- 574 35. Heo, Y.J., Chung, I.Y., Choi, K.B., Lau, G.W. & Cho, Y.H. Genome sequence  
575 comparison and superinfection between two related *Pseudomonas aeruginosa*  
576 phages, D3112 and MP22. *Microbiology* **153**, 2885-2895 (2007).
- 577
- 578 36. Castric, P., Cassels, F.J. & Carlson, R.W. Structural characterization of the  
579 *Pseudomonas aeruginosa* 1244 pilin glycan. *J Biol Chem* **276**, 26479-26485  
580 (2001).
- 581
- 582 37. Tan, R.M. *et al.* Type IV pilus glycosylation mediates resistance of *Pseudomonas*  
583 *aeruginosa* to opsonic activities of the pulmonary surfactant protein A. *Infect*  
584 *Immun* **83**, 1339-1346 (2015).
- 585
- 586 38. James, C.E. *et al.* Lytic activity by temperate phages of *Pseudomonas*  
587 *aeruginosa* in long-term cystic fibrosis chronic lung infections. *ISME J* **9**, 1391-  
588 1398 (2015).

- 589
- 590 39. Westra, E.R. *et al.* Parasite Exposure Drives Selective Evolution of Constitutive  
591 versus Inducible Defense. *Curr Biol* **25**, 1043-1049 (2015).
- 592
- 593 40. Oechslin, F. *et al.* Synergistic interaction between phage therapy and antibiotics  
594 clears *Pseudomonas aeruginosa* infection in endocarditis and reduces virulence.  
595 *J Infect Dis* (2016).
- 596
- 597 41. Scanlan, P.D., Buckling, A. & Hall, A.R. Experimental evolution and bacterial  
598 resistance: (co)evolutionary costs and trade-offs as opportunities in phage  
599 therapy research. *Bacteriophage* **5**, e1050153 (2015).
- 600
- 601 42. Bradley, D.E. The adsorption of *Pseudomonas aeruginosa* pilus-dependent  
602 bacteriophages to a host mutant with nonretractile pili. *Virology* **58**, 149-163  
603 (1974).
- 604
- 605 43. Nguyen, Y. *et al.* Structural and functional studies of the *Pseudomonas*  
606 *aeruginosa* minor pilin, PilE. *J Biol Chem* **290**, 26856-26865 (2015).
- 607
- 608 44. Craig, L. *et al.* Type IV pilin structure and assembly: X-ray and EM analyses of  
609 *Vibrio cholerae* toxin-coregulated pilus and *Pseudomonas aeruginosa* PAK pilin.  
610 *Mol Cell* **11**, 1139-1150 (2003).
- 611
- 612 45. Kolappan, S. *et al.* Structure of the *Neisseria meningitidis* Type IV pilus. *Nat*  
613 *Commun* **7**, 13015 (2016).
- 614
- 615 46. Davidson, A.R., Cardarelli, L., Pell, L.G., Radford, D.R. & Maxwell, K.L. Long  
616 noncontractile tail machines of bacteriophages. *Adv Exp Med Biol* **726**, 115-142  
617 (2012).
- 618
- 619 47. Le, S. *et al.* Mapping the tail fiber as the receptor binding protein responsible for  
620 differential host specificity of *Pseudomonas aeruginosa* bacteriophages PaP1  
621 and JG004. *PLoS One* **8**, e68562 (2013).
- 622
- 623 48. Bondy-Denomy, J., Pawluk, A., Maxwell, K.L. & Davidson, A.R. Bacteriophage  
624 genes that inactivate the CRISPR/Cas bacterial immune system. *Nature* **493**,  
625 429-432 (2013).
- 626

- 627 49. Hoang, T.T., Karkhoff-Schweizer, R.R., Kutchma, A.J. & Schweizer, H.P. A  
628 broad-host-range Flp-FRT recombination system for site-specific excision of  
629 chromosomally-located DNA sequences: application for isolation of unmarked  
630 *Pseudomonas aeruginosa* mutants. *Gene* **212**, 77-86 (1998).  
631
- 632 50. Lavigne, R., Ceysens, P.J. & Robben, J. Phage proteomics: applications of  
633 mass spectrometry. *Methods Mol Biol* **502**, 239-251 (2009).  
634  
635
